# Supplementary material for: Integration of pathway structure information into a reweighted partial Cox regression approach for survival analysis on high-dimensional gene expression data
Source: Royal Society of Chemistry journal article supplement (doi:10.1039/c5mb00044k), 2015-04-02
Supplement: c5mb00044k1.pdf [file c5mb00044k1.pdf]

## Supplementary Information

Figure S1~S4

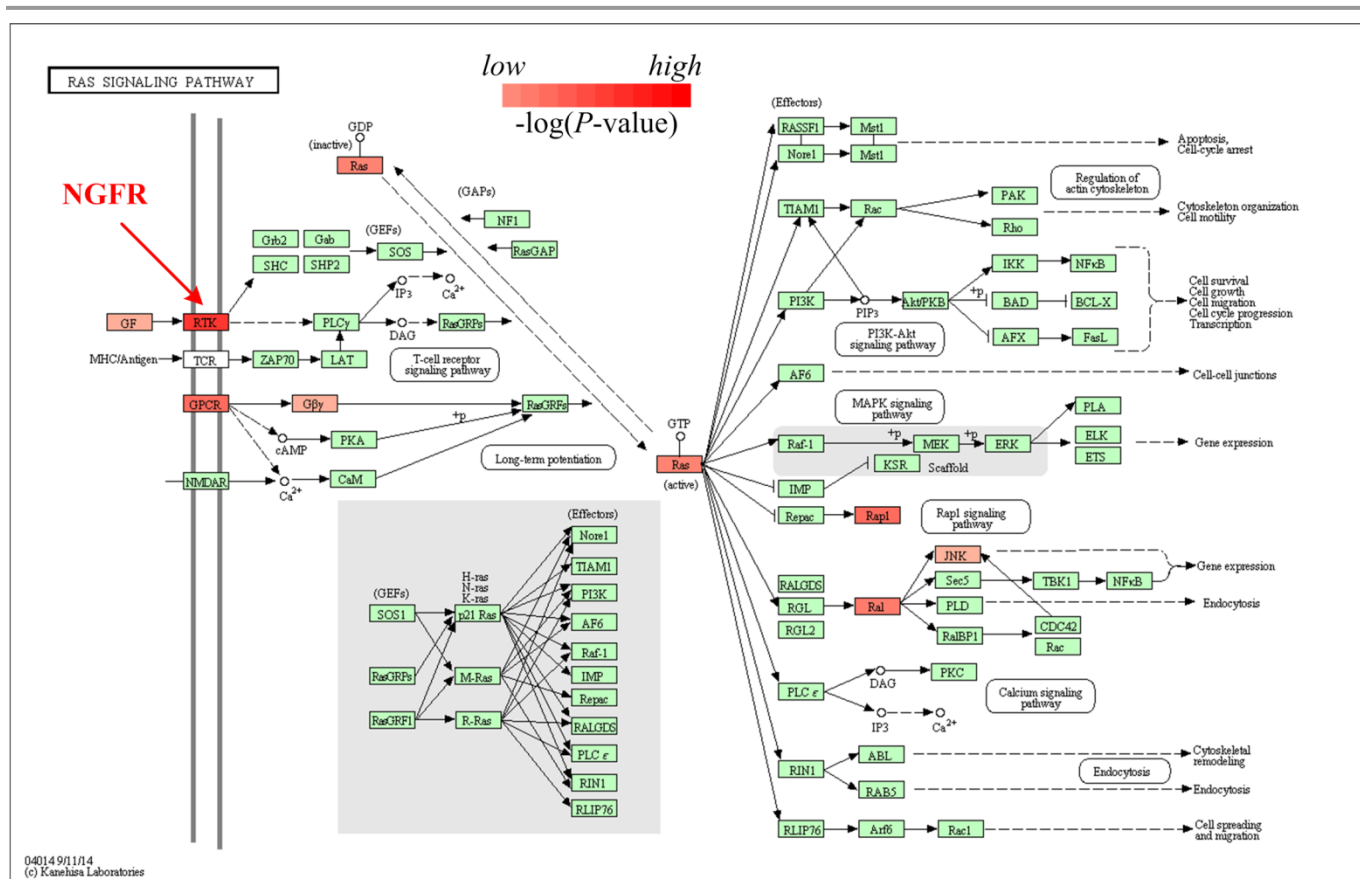

040149/11/14  
 (c) Kanehisa Laboratories

| Gene        | Label      | P-value         | Topological weight | Gene  | Label | P-value  | Topological weight |
|-------------|------------|-----------------|--------------------|-------|-------|----------|--------------------|
| <b>NGFR</b> | <b>RTK</b> | <b>5.91E-04</b> | <b>2.3811</b>      | 22800 | Ras   | 2.34E-03 | 0.9442             |
| 55970       | Gβγ        | 6.11E-03        | 1.3926             | 5899  | Ral   | 2.07E-03 | 0.9243             |
| 5906        | Rap1       | 1.53E-03        | 1.3688             | 80310 | GF    | 6.09E-03 | 0.8606             |
| 5599        | JNK        | 5.44E-03        | 1.1506             | 3363  | GPCR  | 1.53E-03 | 0.8486             |
| 2792        | Gβγ        | 5.23E-03        | 1.0953             | 2254  | GF    | 4.97E-03 | 0.7862             |
| 5154        | GF         | 1.36E-03        | 1.0402             | 2259  | GF    | 7.06E-03 | 0.7441             |
| 1944        | GF         | 5.15E-03        | 1.0312             | 2250  | GF    | 7.13E-03 | 0.7430             |

Figure S1. Topological weights of genes in KEGG Ras signaling pathway. NGFR locates at node "RTK". The genes that locate at the upstream of the pathway and affect multiple genes tend to obtain large topological weights.

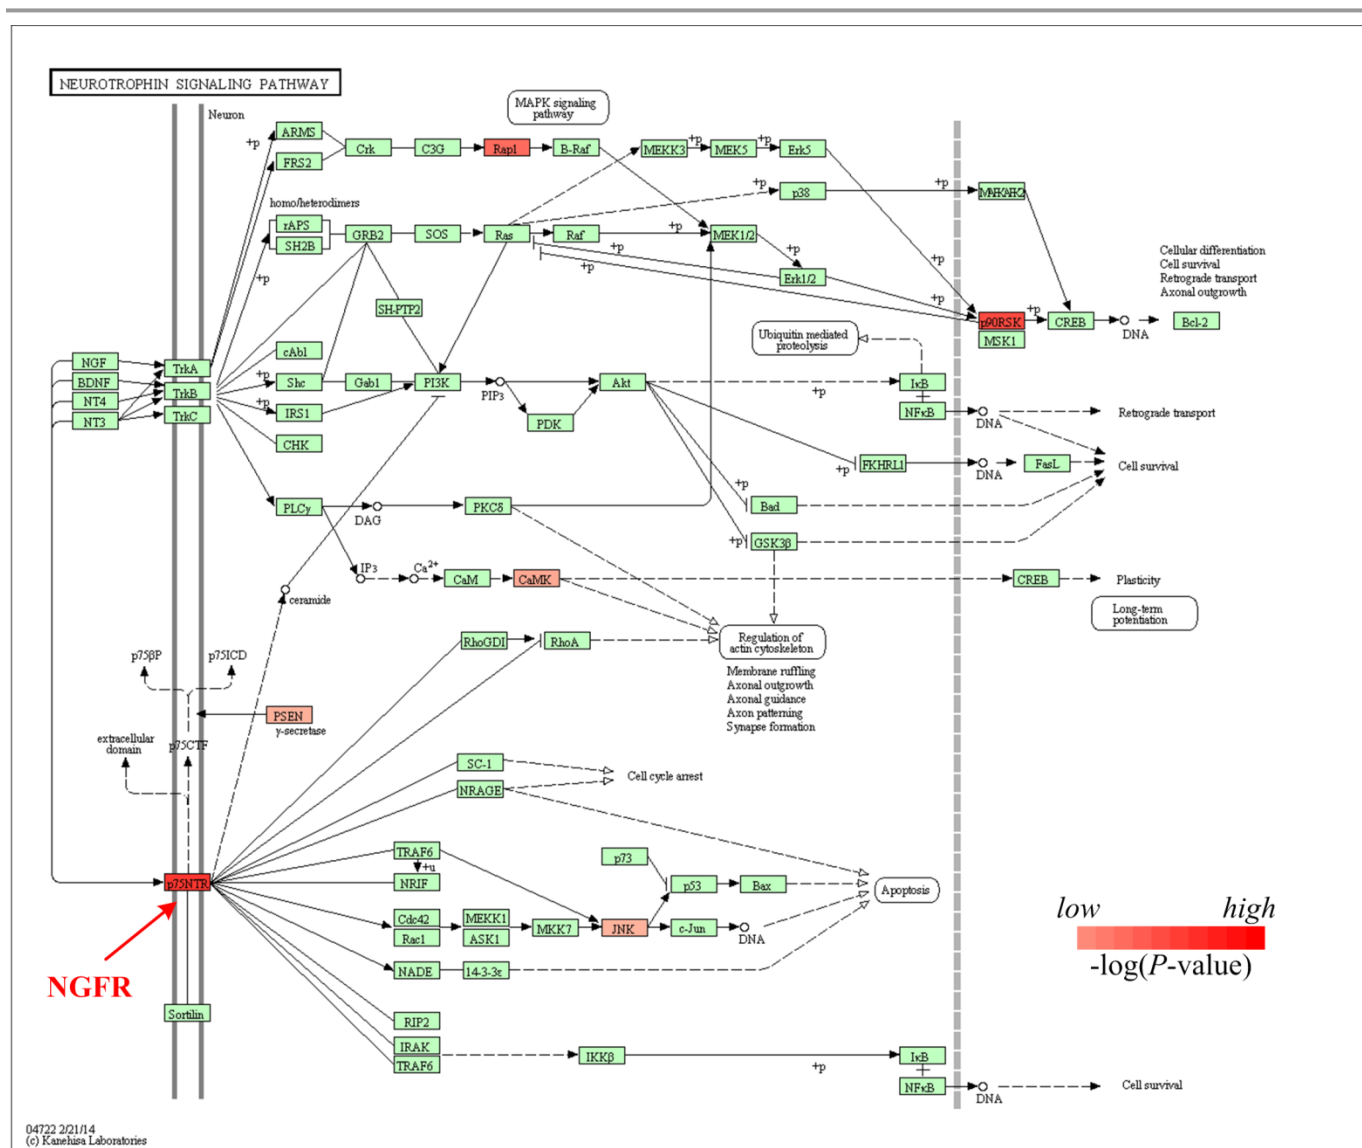

04722 2/21/14  
© Kanehisa Laboratories

| Gene          | Label      | P-value         | Topological weight | Gene    | Label  | P-value  | Topological weight |
|---------------|------------|-----------------|--------------------|---------|--------|----------|--------------------|
| <b>NGFR</b>   | <b>RTK</b> | <b>5.91E-04</b> | <b>2.3811</b>      | MAPK8   | JNK    | 5.44E-03 | 1.1506             |
| <b>RAP1A</b>  | Rap1       | 1.53E-03        | 1.3688             | RPS6KA3 | P90RSK | 8.42E-04 | 1.0194             |
| <b>CAMK2A</b> | CaMK       | 4.58E-03        | 1.2359             | PSEN2   | PSEN   | 5.34E-03 | 0.9022             |

**Figure S2. Topological weights of genes in KEGG Neurotrophin signaling pathway.** NGFR locates at node “p75NTR”. The genes that locate at the upstream of the pathway and affect multiple genes tend to obtain large topological weights.

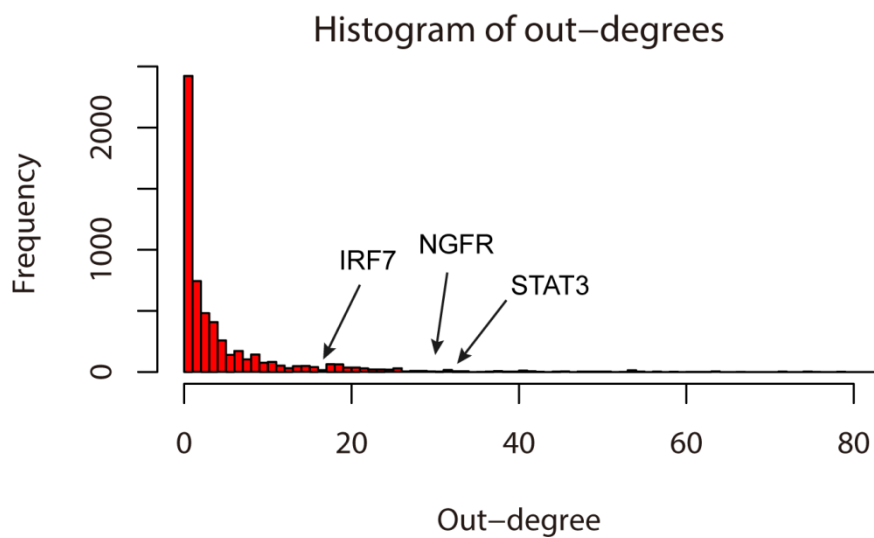

**Figure S3. Histogram of out-degrees of genes in the global pathway graph.** The out-degrees of the top three genes that receive large topological importance are showed.

---

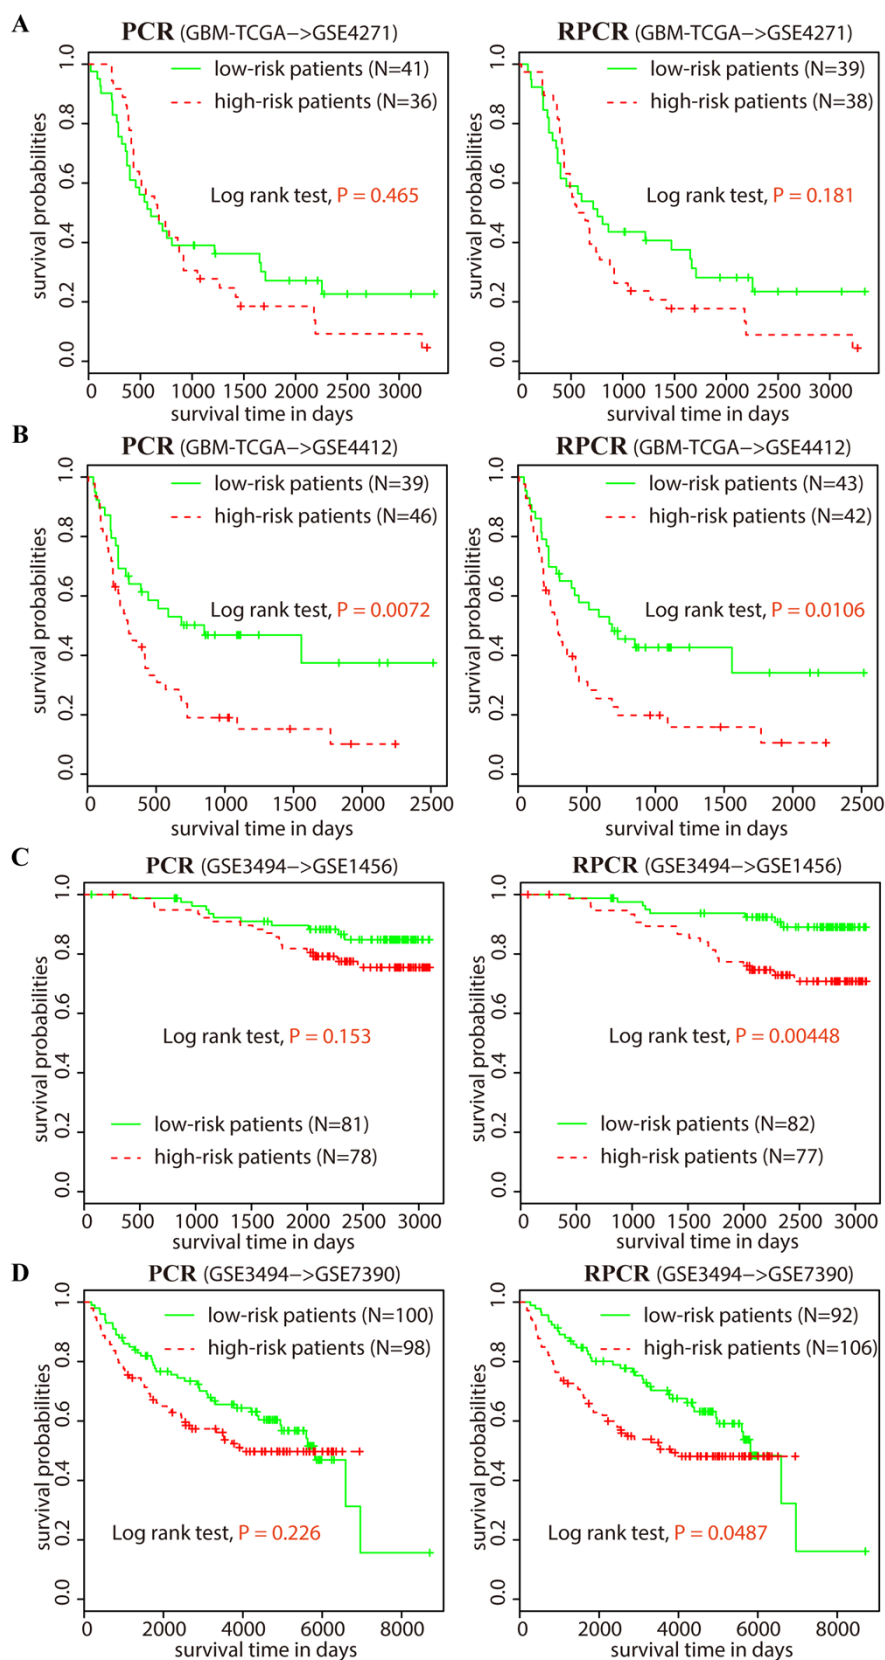

**Figure S4. Kaplan-Meier curves for patients stratified by RPCR and PCR with threshold  $P < 0.05$ .**
