# Supplementary material for: Integration of pathway structure information into a reweighted partial Cox regression approach for survival analysis on high-dimensional gene expression data
Source: Royal Society of Chemistry journal article supplement (doi:10.1039/c5mb00044k), 2015-04-02
Supplement: c5mb00044k2.xlsx [file c5mb00044k2.xlsx]

## Sheet: Sheet1
Table S1. The topological weights and coefficients of genes in the PCR and RPCR model on the "GBM-TCGA" data set.
Entrez Gene ID	HGNC Symbol	Topological weight	Normalized topological weight	Topological weight rank	P-value1	P-value rank	Coefficients in the PCR model	Coefficients in the RPCR model
4804	NGFR	0.00098456	2.3811	1	0.000591255	46	0.0953232	0.226974
3665	IRF7	0.000901899	2.18118	2	0.00284227	108	0.131055	0.285855
6774	STAT3	0.000850353	2.05653	3	0.00318307	112	0.0112296	0.023094
64374	SIL1	0.00082578	1.9971	4	0.000123252	13	0.0882722	0.176288
8717	TRADD	0.000757938	1.83302	5	0.000457507	33	-0.0781024	-0.143164
9021	SOCS3	0.000711271	1.72016	6	0.00115098	59	-0.0274725	-0.0472571
122622	ADSSL1	0.000690658	1.67031	7	1.65873e-06	1	0.170144	0.284193
22798	LAMB4	0.000669667	1.61955	8	1.90672e-05	3	0.221661	0.35899
29108	PYCARD	0.000666712	1.6124	9	0.00612747	164	-0.00621235	-0.0100168
3689	ITGB2	0.00065972	1.59549	10	0.00339715	119	0.00886454	0.0141433
3309	HSPA5	0.000639062	1.54553	11	0.000272721	21	-0.0220568	-0.0340895
834	CASP1	0.00063096	1.52594	12	0.00027715	22	-0.00195459	-0.00298258
7132	TNFRSF1A	0.000618511	1.49583	13	0.00140985	70	-0.120352	-0.180026
6696	SPP1	0.000601616	1.45497	14	0.000184627	17	0.0491084	0.0714512
1948	EFNB2	0.000595943	1.44125	15	1.89947e-05	2	0.125083	0.180276
6885	MAP3K7	0.000591366	1.43018	16	0.00833217	188	-0.144357	-0.206456
200316	APOBEC3F	0.000583541	1.41126	17	5.61809e-05	5	-0.0711665	-0.100434
25956	SEC31B	0.00058295	1.40983	18	0.00168965	81	-0.0011184	-0.00157675
55970	GNG12	0.000575824	1.39259	19	0.00611062	163	0.0311499	0.0433791
5906	RAP1A	0.000565972	1.36877	20	0.0015345	75	0.106823	0.146215
27350	APOBEC3C	0.000565517	1.36767	21	8.08292e-05	6	-0.0741103	-0.101358
3693	ITGB5	0.000560151	1.35469	22	0.00245562	101	-0.0561565	-0.0760746
2242	FES	0.000559088	1.35212	23	0.000112916	12	0.0566653	0.0766182
60489	APOBEC3G	0.000555127	1.34254	24	9.96862e-05	7	-0.0113335	-0.0152157
84790	TUBA1C	0.000551886	1.3347	25	0.00155385	76	0.0892308	0.119096
3460	IFNGR2	0.000540957	1.30827	26	0.000412374	30	-0.0658739	-0.0861808
3486	IGFBP3	0.00053867	1.30274	27	0.000437365	31	0.128504	0.167408
1968	EIF2S3	0.000535227	1.29441	28	0.00135135	67	-0.238089	-0.308184
3556	IL1RAP	0.0005337	1.29072	29	0.00122758	63	0.0166313	0.0214664
23590	PDSS1P1	0.000533434	1.29008	30	3.68041e-05	4	-0.108957	-0.140563
3691	ITGB4	0.000532652	1.28818	31	0.00427748	133	-0.0640696	-0.0825335
3696	ITGB8	0.000522872	1.26453	32	0.00521081	149	-0.124028	-0.156837
5532	PPP3CB	0.000522128	1.26273	33	0.00798163	184	0.0196811	0.024852
109	ADCY3	0.000521064	1.26016	34	0.00320346	113	-0.00407331	-0.00513302
26270	FBXO6	0.000520905	1.25978	35	0.000109831	10	0.0714271	0.0899821
10451	VAV3	0.00051807	1.25292	36	0.00223933	98	-0.0428509	-0.0536886
4615	MYD88	0.000517342	1.25116	37	0.0083769	190	0.135081	0.169007
10901	DHRS4L2	0.000514582	1.24448	38	0.000288653	24	0.171253	0.213121
35	ACADS	0.000513385	1.24159	39	0.000104343	9	0.0665081	0.0439053
3939	LDHA	0.000512127	1.23855	40	0.000112021	11	0.0897853	0.111203
815	CAMK2A	0.000511024	1.23588	41	0.00457524	137	0.0523729	0.0647265
8737	RIPK1	0.000509446	1.23206	42	0.00351192	120	-0.379361	-0.467397
8453	CUL2	0.000505717	1.22304	43	9.97621e-05	8	-0.214172	-0.261942
4129	MAOB	0.000504252	1.2195	44	0.000960022	57	-0.00488028	-0.0059515
3310	HSPA6	0.000502268	1.2147	45	0.00372157	124	0.092344	0.11217
87	ACTN1	0.0004944	1.19567	46	0.00773089	181	0.0350746	0.0352211
4478	MSN	0.00049288	1.192	47	0.000700203	48	-0.0346351	-0.041285
2768	GNA12	0.000491833	1.18947	48	0.00165108	80	-0.0266845	-0.0317404
10209	EIF1	0.000490611	1.18651	49	0.00332521	118	0.270034	0.320398
8324	FZD7	0.000485571	1.17432	50	0.000448103	32	0.0448216	0.0526349
7187	TRAF3	0.000485185	1.17339	51	0.00494163	145	0.139118	0.16324
1488	CTBP2	0.000482152	1.16605	52	0.000511696	40	-0.00470837	-0.00549021
10588	MTHFS	0.000481713	1.16499	53	0.00014407	15	0.119753	0.139512
5137	PDE1C	0.000478022	1.15607	54	0.00013304	14	0.0956347	0.11056
5599	MAPK8	0.000475763	1.1506	55	0.00543697	155	-0.0331249	-0.0381136
51744	CD244	0.000474535	1.14763	56	0.000507835	39	0.0981293	0.112616
3381	IBSP	0.000474466	1.14747	57	0.000583326	45	0.0107592	0.0123458
23480	SEC61G	0.000474263	1.14698	58	0.00302233	110	0.0398094	0.0456604
79660	PPP1R3B	0.00047414	1.14668	59	0.00147438	73	-0.0154266	-0.0176893
349565	NMNAT3	0.000473353	1.14477	60	0.000928377	55	0.0701729	0.080332
30	ACAA1	0.000461571	1.11628	61	0.00535614	153	-0.0228463	-0.0211695
79723	SUV39H2	0.000461522	1.11616	62	0.00026848	20	0.0614485	0.0685865
137075	CLDN23	0.000460594	1.11392	63	0.000565907	44	-0.0425308	-0.0473759
22929	SEPHS1	0.000459427	1.1111	64	0.0005584	42	-0.000769018	-0.000854452
1643	DDB2	0.000455335	1.1012	65	0.000160236	16	-0.00400228	-0.0044073
5328	PLAU	0.000454906	1.10016	66	0.00258176	102	-0.0736485	-0.0810252
51056	LAP3	0.000453467	1.09668	67	0.00134925	66	-0.0199873	-0.0219197
2792	GNGT1	0.00045289	1.09528	68	0.00522849	150	-0.141538	-0.155024
838	CASP5	0.000449961	1.0882	69	0.000564662	43	-0.000419827	-0.000456857
55240	STEAP3	0.000447593	1.08248	70	0.000187333	18	-0.0479713	-0.0519278
10673	TNFSF13B	0.000441461	1.06765	71	0.00938776	204	-0.00298517	-0.00318711
3597	IL13RA1	0.00044127	1.06718	72	0.000286029	23	0.0459072	0.0489914
3646	EIF3E	0.000435819	1.054	73	0.00358075	122	0.0365249	0.0384973
10961	ERP29	0.00043495	1.0519	74	0.000241785	19	0.00817118	0.00859526
5742	PTGS1	0.000433749	1.049	75	0.00155627	77	-0.0288725	-0.0302871
7494	XBP1	0.000432698	1.04645	76	0.000308768	27	0.235328	0.24626
8027	STAM	0.000432505	1.04598	77	0.000929665	56	-0.150141	-0.157046
5154	PDGFA	0.000430098	1.04016	78	0.00136096	68	-0.0446361	-0.0464289
5158	PDE6B	0.000427369	1.03356	79	0.000306796	26	0.0842893	0.0871184
1944	EFNA3	0.000426402	1.03123	80	0.00514994	148	-0.191814	-0.197804
6720	SREBF1	0.000425116	1.02811	81	0.00222048	97	0.0727931	0.0748396
362	AQP5	0.000423421	1.02402	82	0.000305126	25	0.0443353	0.0454001
1787	TRDMT1	0.000421607	1.01963	83	0.000372521	29	-0.144217	-0.147048
6197	RPS6KA3	0.000421513	1.0194	84	0.000842111	52	0.0857758	0.0874402
3423	IDS	0.000421029	1.01823	85	0.000320216	28	0.0532929	0.0542646
2318	FLNC	0.00041978	1.01521	86	0.00198805	87	0.00792533	0.00804587
1571	CYP2E1	0.000418356	1.01177	87	0.00122752	62	-0.0303274	-0.0306843
160851	DGKH	0.000417998	1.0109	88	0.000856416	53	-0.404846	-0.409259
11164	NUDT5	0.000416757	1.0079	89	0.000479282	37	0.0298055	0.030041
873	CBR1	0.000415218	1.00418	90	0.000484995	38	0.0350746	0.0352211
54961	SSH3	0.000410163	0.991952	91	0.000470729	36	-0.0743637	-0.0737652
2053	EPHX2	0.000408231	0.987281	92	0.000912157	54	0.0539483	0.0532621
9547	CXCL14	0.000406426	0.982916	93	0.00380838	128	-0.00949886	-0.00933659
9180	OSMR	0.000403359	0.975498	94	0.000614741	47	0.143779	0.140256
79695	GALNT12	0.000402542	0.973521	95	0.000465034	34	0.106713	0.103887
51513	ETV7	0.000402534	0.973503	96	0.000465105	35	-0.0200819	-0.0195498
2064	ERBB2	0.00040186	0.971873	97	0.0052768	151	-0.0466231	-0.0453117
286365	OR13D1	0.000396475	0.958848	98	0.000529887	41	0.560117	0.537067
57292	KIR2DL5A	0.000396372	0.958601	99	0.00159982	78	-0.0832691	-0.0798218
3803	KIR2DL2	0.000396372	0.958601	100	0.00159982	79	-0.0832691	-0.0798218
3101	HK3	0.000395832	0.957294	101	0.00992884	213	0.0468316	0.0448316
7314	UBB	0.000393952	0.952749	102	0.00751208	178	0.0366024	0.0348729
130589	GALM	0.000393374	0.951351	103	0.00141399	71	0.0279952	0.0266333
91734	IDI2	0.000391285	0.946297	104	0.0039336	130	0.0915005	0.0865867
22800	RRAS2	0.000390418	0.944202	105	0.00233588	99	0.185034	0.174709
30833	NT5C	0.000390143	0.943536	106	0.00568872	158	0.337259	0.318216
55844	PPP2R2D	0.000388987	0.940739	107	0.0027988	107	-0.0799421	-0.0752047
10505	SEMA4F	0.000386196	0.93399	108	0.001364	69	0.134619	0.125733
1635	DCTD	0.000385738	0.932883	109	0.000751449	49	0.0424656	0.0396154
10095	ARPC1B	0.000383606	0.927728	110	0.00124979	64	0.0121447	0.011267
259230	SGMS1	0.000383143	0.926607	111	0.0071648	173	-0.0228463	-0.0211695
2184	FAH	0.000382817	0.925818	112	0.0014624	72	-0.091735	-0.08493
5899	RALB	0.000382195	0.924315	113	0.00206616	91	-0.0315627	-0.0291739
5832	ALDH18A1	0.000376248	0.909933	114	0.00220937	96	0.0277227	0.0252258
134	ADORA1	0.000376186	0.909781	115	0.000791572	50	-0.0686021	-0.0447873
10010	TANK	0.000375195	0.907385	116	0.00597339	161	-0.043917	-0.0398497
9601	PDIA4	0.000374971	0.906844	117	0.000811211	51	-0.0144697	-0.0131217
5664	PSEN2	0.000373033	0.902157	118	0.00533769	152	-0.22422	-0.202281
3625	INHBB	0.000370175	0.895246	119	0.0037316	125	-0.0141128	-0.0126344
435	ASL	0.000365986	0.885114	120	0.00267088	103	-0.0859513	-0.0760767
51706	CYB5R1	0.000365613	0.884212	121	0.00108847	58	-0.0459426	-0.040623
3269	HRH1	0.000364554	0.881651	122	0.00118006	61	-0.0253706	-0.022368
55742	PARVA	0.000363771	0.879757	123	0.00936116	203	-0.0403067	-0.0354601
6718	AKR1D1	0.000361323	0.873837	124	0.00722773	174	-0.0435786	-0.0380806
8837	CFLAR	0.000360912	0.872842	125	0.00635817	168	-0.0715232	-0.0624284
79132	DHX58	0.000358235	0.866368	126	0.00301551	109	0.0088216	0.00764276
4825	NKX6-1	0.000357214	0.863898	127	0.00116085	60	-0.256176	-0.22131
80310	PDGFD	0.000355862	0.860628	128	0.00608856	162	0.0385444	0.0331724
25885	POLR1A	0.000354537	0.857425	129	0.00620949	165	-0.301108	-0.258178
6611	SMS	0.000354377	0.857037	130	0.00468535	139	-0.0204541	-0.0175299
26873	OPLAH	0.000353098	0.853946	131	0.00208488	94	-0.00968147	-0.00826745
7184	HSP90B1	0.000351987	0.851257	132	0.00446297	136	0.0210226	0.0178956
706	TSPO	0.000350894	0.848615	133	0.00131876	65	-0.0459426	-0.040623
3363	HTR7	0.000350887	0.848596	134	0.00152891	74	0.196559	0.166799
1030	CDKN2B	0.000350351	0.847301	135	0.00237718	100	-0.0167364	-0.0141808
3426	CFI	0.000349526	0.845306	136	0.00208312	93	-0.0306356	-0.0258965
7417	VDAC2	0.000347141	0.839538	137	0.0020346	90	-0.0122445	-0.0102798
1460	CSNK2B	0.000346886	0.83892	138	0.00382413	129	-0.221876	-0.186136
6888	TALDO1	0.000346074	0.836959	139	0.00589258	159	0.361129	0.30225
1027	CDKN1B	0.000346028	0.836847	140	0.00750294	177	-0.0241196	-0.0201844
6609	SMPD1	0.000343909	0.831722	141	0.00198183	86	-0.0926222	-0.0770359
10282	BET1	0.00034307	0.829694	142	0.00555048	157	0.091122	0.0756033
2213	FCGR2B	0.000343042	0.829626	143	0.00272372	105	0.0317864	0.0263708
79717	PPCS	0.000340542	0.823578	144	0.00181762	83	-0.0519273	-0.0427662
1788	DNMT3A	0.000340165	0.822667	145	0.00192743	84	-0.0409574	-0.0336943
1355	COX15	0.000338943	0.819712	146	0.00196519	85	-0.0581411	-0.047659
716	C1S	0.000337564	0.816378	147	0.00278281	106	-0.0126206	-0.0103032
83547	RILP	0.000337145	0.815364	148	0.00330184	116	-0.0701565	-0.057203
1647	GADD45A	0.000336818	0.814573	149	0.00641357	169	-0.00355734	-0.00289771
4688	NCF2	0.00033582	0.812158	150	0.00990586	212	0.00735431	0.00597286
960	CD44	0.000335708	0.811889	151	0.0017917	82	-0.0144697	-0.0131217
5329	PLAUR	0.000329996	0.798075	152	0.00201062	88	0.0220455	0.017594
2590	GALNT2	0.000329573	0.797051	153	0.00202788	89	-0.11566	-0.0921873
3034	HAL	0.000328879	0.795373	154	0.00809979	185	-0.0248297	-0.0197489
56288	PARD3	0.000328785	0.795145	155	0.00367824	123	-0.167431	-0.133132
51330	TNFRSF12A	0.000328408	0.794233	156	0.00207613	92	-0.109332	-0.0868352
1142	CHRNB3	0.000326452	0.789503	157	0.00215972	95	-0.233017	-0.183967
2254	FGF9	0.000325106	0.786249	158	0.0049659	146	0.00860506	0.00676572
2876	GPX1	0.000324475	0.784722	159	0.0027164	104	0.0449539	0.0352763
5792	PTPRF	0.0003222	0.779221	160	0.00865899	195	0.140149	0.109207
132	ADK	0.00032177	0.778179	161	0.00471915	140	0.0088216	0.00764276
710	SERPING1	0.000320936	0.776163	162	0.00331396	117	-0.0369099	-0.0286481
80319	CXXC4	0.000320275	0.774566	163	0.0048378	142	-0.0657549	-0.0509315
1508	CTSB	0.00031784	0.768676	164	0.00399398	131	0.0212484	0.0163331
635	BHMT	0.000317516	0.767892	165	0.00731164	175	-0.171784	-0.131911
965	CD58	0.000316661	0.765823	166	0.00826629	186	0.0442023	0.0338512
93589	CACNA2D4	0.000313517	0.758219	167	0.00376324	126	0.184382	0.139802
5795	PTPRJ	0.000313285	0.75766	168	0.00323642	114	-0.102154	-0.077398
9517	SPTLC2	0.000313046	0.757082	169	0.00317159	111	0.009589	0.00725965
1261	CNGA3	0.000313008	0.75699	170	0.00841087	191	-0.0100248	-0.00758871
51311	TLR8	0.000312658	0.756143	171	0.00592526	160	-0.0371736	-0.0281085
2747	GLUD2	0.000311176	0.752558	172	0.00988888	211	-0.184609	-0.138929
118672	PSTK	0.000309914	0.749507	173	0.00462738	138	-0.0966212	-0.0724183
761	CA3	0.000309245	0.74789	174	0.00887595	198	-0.0175123	-0.0130973
8443	GNPAT	0.000308204	0.745372	175	0.00438547	135	-0.201401	-0.150119
2259	FGF14	0.000307698	0.744147	176	0.00705641	171	0.0662269	0.0492825
2250	FGF5	0.00030721	0.742967	177	0.00712625	172	-0.0414064	-0.0307636
5269	SERPINB6	0.000306445	0.741117	178	0.00378984	127	-0.144131	-0.106818
23765	IL17RA	0.000306392	0.740989	179	0.00323756	115	0.0424921	0.0314862
4837	USP15	0.000305115	0.7379	180	0.00437091	134	0.0030282	0.00223451
56895	AGPAT4	0.000304078	0.735392	181	0.00553643	156	-0.217208	-0.159733
5606	MAP2K3	0.000303247	0.733383	182	0.00660278	170	-0.0774601	-0.0568079
51451	LCMT1	0.00030271	0.732086	183	0.00479932	141	-0.219923	-0.161003
2847	MCHR1	0.000301742	0.729744	184	0.0035561	121	0.0246809	0.0180107
5836	PYGL	0.000295042	0.71354	185	0.00910415	201	-0.0711176	-0.0507453
120066	OR5P3	0.00029346	0.709715	186	0.00423727	132	0.287442	0.204002
5575	PRKAR1B	0.000293432	0.709647	187	0.00848609	193	0.34676	0.246077
10105	PPIF	0.000288832	0.698521	188	0.0053588	154	-0.0112899	-0.00788626
1356	CP	0.000287795	0.696014	189	0.00492932	144	-0.0145792	-0.0101473
28514	DLL1	0.000287047	0.694205	190	0.00751812	179	-0.0380293	-0.0264001
219453	OR8K5	0.000286761	0.693514	191	0.00485066	143	0.262245	0.18187
2512	FTL	0.00028606	0.691818	192	0.00510495	147	0.0250452	0.0173267
114609	TIRAP	0.000283503	0.685633	193	0.00892998	199	-0.212737	-0.14586
10552	ARPC1A	0.000283437	0.685475	194	0.00943628	205	0.130125	0.0891977
7869	SEMA3B	0.000281349	0.680426	195	0.00624955	167	-0.0798574	-0.0543371
2581	GALC	0.00027747	0.671044	196	0.00757517	180	-0.0567397	-0.0380748
8309	ACOX2	0.000276406	0.668471	197	0.00945539	206	-0.0682864	-0.0456475
5025	P2RX4	0.000274511	0.663887	198	0.00826874	187	-0.0762866	-0.0506457
4035	LRP1	0.000274122	0.662946	199	0.00620958	166	-0.00982842	-0.00651571
3574	IL7	0.000272966	0.66015	200	0.00787132	182	0.0665081	0.0439053
10846	PDE10A	0.000272227	0.658363	201	0.00846718	192	-0.00433858	-0.00285636
134526	ACOT12	0.00026995	0.652856	202	0.00750158	176	-0.0686021	-0.0447873
10555	AGPAT2	0.000269222	0.651096	203	0.00881	197	-0.0898822	-0.0585219
650	BMP2	0.000266655	0.644888	204	0.00792959	183	0.00841746	0.00542832
135	ADORA2A	0.000260316	0.629559	205	0.00951069	207	-0.295391	-0.185966
55740	ENAH	0.000259498	0.62758	206	0.00834131	189	-0.060394	-0.0379021
2152	F3	0.000259436	0.627429	207	0.00962296	208	-0.0491566	-0.0308423
127064	OR2T12	0.000258393	0.624906	208	0.00859898	194	0.00647364	0.00404542
7253	TSHR	0.000257595	0.622976	209	0.00866797	196	-0.0852286	-0.0530954
5034	P4HB	0.000255551	0.618033	210	0.009033	200	0.0226323	0.0139875
122748	OR11H6	0.000254804	0.616227	211	0.0092449	202	-0.399902	-0.246431
2165	F13B	0.000253802	0.613803	212	0.00978886	209	-0.0459524	-0.0282057
3375	IAPP	0.000251275	0.607694	213	0.00984701	210	-0.130037	-0.0790226
1The p-values from the univariate Cox regression analysis of genes in the global pathway graph.
