# Supplementary material for: Integration of pathway structure information into a reweighted partial Cox regression approach for survival analysis on high-dimensional gene expression data
Source: Royal Society of Chemistry journal article supplement (doi:10.1039/c5mb00044k), 2015-04-02
Supplement: c5mb00044k3.pdf [file c5mb00044k3.pdf]

**Table S2.** Clinical information of samples in the training set, the test set and the entire “GBM-TCGA” data set.

| <b>Characteristic</b>         | <b>Training set</b> | <b>Test set</b> | <b>Entire patient set</b> |
|-------------------------------|---------------------|-----------------|---------------------------|
| <b>Number of patients</b>     | 156                 | 155             | 311                       |
| <b>Age</b>                    | 53.8±14.4           | 56.6±13.6       | 55.2±14.0                 |
| <b>Survival days(mean±sd)</b> | 547.0±608.0         | 506.5±495.5     | 526.8±554.3               |
| <b>Decreased</b>              | 115(73.7%)          | 115(74.2%)      | 230(74.0%)                |
| <b>Alive</b>                  | 41(26.3%)           | 40(25.8%)       | 81(26.0%)                 |
| <b>Gender</b>                 |                     |                 |                           |
| <b>Male</b>                   | 95(60.9%)           | 98(63.2%)       | 193(62.1%)                |
| <b>Female</b>                 | 61(39.1%)           | 57(36.8%)       | 118(37.9%)                |
