# Supplementary material for: Integration of pathway structure information into a reweighted partial Cox regression approach for survival analysis on high-dimensional gene expression data
Source: Royal Society of Chemistry journal article supplement (doi:10.1039/c5mb00044k), 2015-04-02
Supplement: c5mb00044k4.xlsx [file c5mb00044k4.xlsx]

## Sheet: Sheet1
Table S3. The survival time of patients in the high and low risk groups of GSE4271 defined by RPCR and PCR.
High-risk group defined by RPCR	High-risk group defined by PCR	Low-risk group defined by RPCR	Low-risk group defined by PCR
21	224	84	21
224	224	112	84
224	224	119	112
224	238	231	119
238	329	231	231
322	364	273	231
329	371	287	273
364	385	287	287
371	392	357	287
385	413	371	322
392	413	371	357
413	434	399	371
413	434	399	371
434	434	455	399
434	490	490	399
434	511	567	455
490	539	602	490
511	553	714	567
539	637	756	602
553	665	805	714
637	679	861	756
665	679	1015+	805
679	742	1022+	861
679	777	1218	1015+
742	875	1225+	1022+
777	917	1470	1218
875	917	1470+	1225+
917	1050	1652	1470
917	1078+	1666	1652
1050	1267	1708	1666
1078+	1421	1939+	1708
1267	1470+	2100+	1939+
1421	1694+	2212+	2100+
1694+	2177	2254	2212+
2177	2191	2275+	2254
2191	3220	2499+	2275+
3220	3269+	2681+	2499+
3269+		3115+	2681+
		3339+	3115+
			3339+
