# Supplementary material for: Integration of pathway structure information into a reweighted partial Cox regression approach for survival analysis on high-dimensional gene expression data
Source: Royal Society of Chemistry journal article supplement (doi:10.1039/c5mb00044k), 2015-04-02
Supplement: c5mb00044k5.xlsx [file c5mb00044k5.xlsx]

## Sheet: Sheet1
Table S4. Comparison of survival percentage of patients in the high risk group defined by RPCR and PCR at each time point.
	High-risk group defined by RPCR				High-risk group defined by PCR
Ordered failure times t(f)	# of subjects in the risk set n	# of failures m	# censored in [t(f), t(f+1)) q	survival percentage S	# of subjects in the risk set n	# of failures m	# censored in [t(f), t(f+1)) q	survival percentage S
0	38	0	0	1	37	0	0	1
21	38	1	0	0.9737a	37	0	0	1
84	37	0	0	0.973684	37	0	0	1
112	37	0	0	0.973684	37	0	0	1
119	37	0	0	0.973684	37	0	0	1
224	37	3	0	0.894737	37	3	0	0.918919
231	34	0	0	0.894737	34	0	0	0.918919
238	34	1	0	0.868421	34	1	0	0.891892
273	33	0	0	0.868421	33	0	0	0.891892
287	33	0	0	0.868421	33	0	0	0.891892
322	33	1	0	0.842105	33	0	0	0.891892
329	32	1	0	0.815789	33	1	0	0.864865
357	31	0	0	0.815789	32	0	0	0.864865
364	31	1	0	0.789474	32	1	0	0.837838
371	30	1	0	0.763158	31	1	0	0.810811
385	29	1	0	0.736842	30	1	0	0.783784
392	28	1	0	0.710526	29	1	0	0.756757
399	27	0	0	0.710526	28	0	0	0.756757
413	27	2	0	0.657895	28	2	0	0.702703
434	25	3	0	0.578947	26	3	0	0.621622
455	22	0	0	0.578947	23	0	0	0.621622
490	22	1	0	0.552632	23	1	0	0.594595
511	21	1	0	0.526316	22	1	0	0.567568
539	20	1	0	0.5	21	1	0	0.540541
553	19	1	0	0.473684	20	1	0	0.513514
567	18	0	0	0.473684	19	0	0	0.513514
602	18	0	0	0.473684	19	0	0	0.513514
637	18	1	0	0.447368	19	1	0	0.486486
665	17	1	0	0.421053	18	1	0	0.459459
679	16	2	0	0.368421	17	2	0	0.405405
714	14	0	0	0.368421	15	0	0	0.405405
742	14	1	0	0.342105	15	1	0	0.378378
756	13	0	0	0.342105	14	0	0	0.378378
777	13	1	0	0.315789	14	1	0	0.351351
805	12	0	0	0.315789	13	0	0	0.351351
861	12	0	0	0.315789	13	0	0	0.351351
875	12	1	0	0.289474	13	1	0	0.324324
917	11	2	0	0.236842	12	2	0	0.27027
1050	9	1	1	0.210526	10	1	1	0.243243
1218	7	0	0	0.184211	8	0	0	0.216216
1267	7	1	0	0.157895	8	1	0	0.189189
1421	6	1	0	0.131579	7	1	0	0.162162
1470	5	0	0	0.131579	6	0	1	0.162162
1652	5	0	0	0.131579	5	0	0	0.135135
1666	5	0	1	0.131579	5	0	1	0.135135
1708	4	0	0	0.105263	4	0	0	0.108108
2177	4	1	0	0.0789474	4	1	0	0.0810811
2191	3	1	0	0.0526316	3	1	0	0.0540541
2254	2	0	0	0.0526316	2	0	0	0.0540541
3220	2	1	0	0.0263158	2	1	0	0.027027
>3220	1	0	1	0.0263158	1	0	1	0.027027
aAt each time point, the survival percentage of patients in the high risk group defined by RPCR is lower than that defined by PCR (Shown in red), indicating that the RPCR method give a better stratification of patients into high risk group.
