# Supplementary material for: Integration of pathway structure information into a reweighted partial Cox regression approach for survival analysis on high-dimensional gene expression data
Source: Royal Society of Chemistry journal article supplement (doi:10.1039/c5mb00044k), 2015-04-02
Supplement: c5mb00044k6.xlsx [file c5mb00044k6.xlsx]

## Sheet: Sheet1
Table S5. Comparison of survival percentage of patients in low risk group defined by RPCR and PCR at each time point.
	Low-risk group defined by RPCR				Low-risk group defined by PCR
Ordered failure times t(f)	# of subjects in the risk set n	# of failures m	# censored in [t(f), t(f+1)) q	survival percentage S	# of subjects in the risk set n	# of failures m	# censored in [t(f), t(f+1)) q	survival percentage S
0	39	0	0	1	40	0	0	1
21	39	0	0	1a	40	1	0	0.975
84	39	1	0	0.974359	39	1	0	0.95
112	38	1	0	0.948718	38	1	0	0.925
119	37	1	0	0.923077	37	1	0	0.9
224	36	0	0	0.923077	36	0	0	0.9
231	36	2	0	0.871795	36	2	0	0.85
238	34	0	0	0.871795	34	0	0	0.85
273	34	1	0	0.846154	34	1	0	0.825
287	33	2	0	0.794872	33	2	0	0.775
322	31	0	0	0.794872	31	1	0	0.75
329	31	0	0	0.794872	30	0	0	0.75
357	31	1	0	0.769231	30	1	0	0.725
364	30	0	0	0.769231	29	0	0	0.707317
371	30	2	0	0.717949	29	2	0	0.675
385	28	0	0	0.717949	27	0	0	0.675
392	28	0	0	0.717949	27	0	0	0.675
399	28	2	0	0.666667	27	2	0	0.625
413	26	0	0	0.666667	25	0	0	0.625
434	26	0	0	0.666667	25	0	0	0.625
455	26	1	0	0.641026	25	1	0	0.6
490	25	1	0	0.615385	24	1	0	0.575
511	24	0	0	0.615385	23	0	0	0.575
539	24	0	0	0.615385	23	0	0	0.575
553	24	0	0	0.615385	23	0	0	0.575
567	24	1	0	0.589744	23	1	0	0.55
602	23	1	0	0.564103	22	1	0	0.525
637	22	0	0	0.564103	21	0	0	0.525
665	22	0	0	0.564103	21	0	0	0.525
679	22	0	0	0.564103	21	0	0	0.525
714	22	1	0	0.538462	21	1	0	0.5
742	21	0	0	0.538462	20	0	0	0.5
756	21	1	0	0.512821	20	1	0	0.475
777	20	0	0	0.512821	19	0	0	0.475
805	20	1	0	0.487179	19	1	0	0.45
861	19	1	0	0.461538	18	1	0	0.425
875	18	0	0	0.461538	17	0	0	0.425
917	18	0	2	0.461538	17	0	2	0.425
1050	16	0	0	0.410256	15	0	0	0.375
1218	16	1	1	0.384615	15	1	1	0.35
1267	14	0	0	0.358974	13	0	0	0.325
1421	14	0	0	0.358974	13	0	0	0.325
1470	14	1	1	0.333333	13	1	0	0.3
1652	12	1	0	0.282051	12	1	0	0.275
1666	11	1	0	0.25641	11	1	0	0.25
1708	10	1	2	0.230769	10	1	2	0.225
2177	7	0	0	0.179487	7	0	0	0.175
2191	7	0	1	0.179487	7	0	1	0.175
2254	6	1	4	0.128205	6	1	4	0.125
3220	1	0	0	0.025641	1	0	0	0.025
>3220	1	0	1	0.025641	1	0	1	0.025
aAt each time point, the survival percentage of patients in the low risk group defined by RPCR is higher than that defined by PCR (Shown in blue), indicating that the RPCR method give a better stratification of patients into the low risk group.
