# Supplementary material for: Integration of pathway structure information into a reweighted partial Cox regression approach for survival analysis on high-dimensional gene expression data
Source: Royal Society of Chemistry journal article supplement (doi:10.1039/c5mb00044k), 2015-04-02
Supplement: c5mb00044k7.pdf [file c5mb00044k7.pdf]

**Table S6.** Clinical information of samples in the training set, the test set and the entire GSE3494 data set.

| <b>Characteristic</b>         | <b>Training set</b> | <b>Test set</b>   | <b>Entire patient set</b> |
|-------------------------------|---------------------|-------------------|---------------------------|
| <b>Number of patients</b>     | 117                 | 117               | 234                       |
| <b>Age</b>                    | 62.5±13.6           | 63.0±14.0         | 62.7±13.8                 |
| <b>Survival days(mean±sd)</b> | 3142.276±1312.226   | 2870.869±1429.907 | 3006.572±1376.116         |
| <b>Decreased</b>              | 26(22.2%)           | 28(23.9%)         | 54(23.1%)                 |
| <b>Alive</b>                  | 34(77.8%)           | 47(76.1%)         | 81(76.9%)                 |
