# Supplementary material for: Integration of pathway structure information into a reweighted partial Cox regression approach for survival analysis on high-dimensional gene expression data
Source: Royal Society of Chemistry journal article supplement (doi:10.1039/c5mb00044k), 2015-04-02
Supplement: c5mb00044k8.pdf [file c5mb00044k8.pdf]

**Table S7.** Literature review of the topologically important genes.

| Gene Symbol     | Description                                                                                                                                                                                   | Ref    |
|-----------------|-----------------------------------------------------------------------------------------------------------------------------------------------------------------------------------------------|--------|
| <b>NGFR</b>     | NGFR activates downstream signaling pathways including the Ras and PI3K-Akt pathway, which coordinately regulate tumor formation.                                                             | 1-5    |
| <b>IRF7</b>     | IRF7 acts as a major driver of brain tumour progression via induction of glioma stem cell genesis and angiogenesis.                                                                           | 6      |
| <b>STAT3</b>    | STAT3 is a potent regulator of gliomagenesis through its induction of angiogenesis, immune invasion, and tumor invasion, and has been targeted by a number of drugs to inhibit glioma growth. | 7-13   |
| <b>TRADD</b>    | TRADD is both a key driver of NF-κB activation in GBM and an important biomarker.                                                                                                             | 14     |
| <b>SOCS3</b>    | SOCS3 hypermethylation in GBM patients is significantly associated with poor outcome.                                                                                                         | 15-17  |
| <b>PYCARD</b>   | Hypermethylation of PYCARD is significantly associated with long-term survival GBM.                                                                                                           | 18     |
| <b>HSPA5</b>    | HSPA5 contributes to increased apoptosis resistance and growth of glioma cells and may be a target for enhancing the therapeutic effect of GBM.                                               | 19, 20 |
| <b>CASP1</b>    | The correlations between regulative apoptotic caspases resulted in altered GBM.                                                                                                               | 21     |
| <b>TNFRSF1A</b> | TNFRSF1A is overexpressed in GBM and shows a significant positive correlation with angiogenesis, suggesting a molecular basis for imaging biomarkers.                                         | 22, 23 |
| <b>SPP1</b>     | Plasma SPP1 increased continuously in malignant glioma patients and was associated with poor survival.                                                                                        | 24, 25 |
| <b>EFNB2</b>    | EFNB2 promotes glioma cell migration and invasion.                                                                                                                                            | 26     |

1. A. Guha, M. M. Feldkamp, N. Lau, G. Boss and A. Pawson, *Oncogene*, 1997, **15**, 2755-2765.
2. E. Tomellini, C. Lagadec, R. Polakowska and X. Le Bourhis, *Cell Mol Life Sci*, 2014, **71**, 2467-2481.
3. E. C. Holland, J. Celestino, C. Dai, L. Schaefer, R. E. Sawaya and G. N. Fuller, *Nat Genet*, 2000, **25**, 55-57.
4. V. K. Rajasekhar, A. Viale, N. D. Socci, M. Wiedmann, X. Hu and E. C. Holland, *Mol Cell*, 2003, **12**, 889-901.
5. Z. Yang, H. Chen, L. Huo, Y. Bai, X. Fan, B. Ni, L. Fang, J. Hu, J. Peng, L. Wang and J. Wang, *Mol Cancer Res*, 2015, **13**, 107-119.
6. X. Jin, S. H. Kim, H. M. Jeon, S. Beck, Y. W. Sohn, J. Yin, J. K. Kim, Y. C. Lim, J. H. Lee, S. H. Kang, X. Pian, M. S. Song, J. B. Park, Y. S. Chae, Y. G. Chung, S. H. Lee, Y. J. Choi, D. H. Nam, Y. K. Choi and H. Kim, *Brain*, 2012, **135**, 1055-1069.
7. A. P. See, J. E. Han, J. Phallen, Z. Binder, G. Gallia, F. Pan, D. Jinasena, C. Jackson, Z. Belcaid, S. J. Jeong, C. Gottschalk, J. Zeng, J. Ruzevick, S. Nicholas, Y. Kim, E. Albesiano, D. M. Pardoll and M. Lim, *J Neurooncol*, 2012, **110**, 359-368.
8. J. E. Kim, M. Patel, J. Ruzevick, C. M. Jackson and M. Lim, *Cancers (Basel)*, 2014, **6**, 376-395.

9. R. B. Luwor, S. S. Stylli and A. H. Kaye, *J Clin Neurosci*, 2013, **20**, 907-911.
10. S. Ball, C. Li, P. K. Li and J. Lin, *PLoS One*, 2011, **6**, e18820.
11. B. Fuh, M. Sobro, L. Cen, D. Josiah, B. Hutzen, K. Cisek, D. Bhasin, N. Regan, L. Lin, C. Chan, H. Caldas, S. DeAngelis, C. Li, P. K. Li and J. Lin, *Br J Cancer*, 2009, **100**, 106-112.
12. Y. Fujiwara, Yoshihiro Komohara, Rino Kudo, Keiichiro Tsurushima, Koji Ohnishi, Tsuyoshi Ikeda and M. Takeya, *Oncology Reports*, 2011, **26**, 1533-1537.
13. K. Sai, S. Wang, V. Balasubramaniyan, C. Conrad, F. F. Lang, K. Aldape, S. Szymanski, I. Fokt, A. Dasgupta, T. Madden, S. Guan, Z. Chen, W. K. Alfred Yung, W. Priebe and H. Colman, *J Neurooncol*, 2012, **107**, 487-501.
14. S. Chakraborty, L. Li, H. Tang, Y. Xie, V. T. Puliappadamba, J. Raisanen, S. Burma, D. A. Boothman, B. Cochran, J. Wu and A. A. Habib, *Neoplasia*, 2013, **15**, 888-897.
15. M. Martini, R. Pallini, G. Luongo, T. Cenci, C. Lucantoni and L. M. Larocca, *Int J Cancer*, 2008, **123**, 2955-2960.
16. Y. Feng, Z. Wang, Z. Bao, W. Yan, G. You, Y. Wang, H. Hu, W. Zhang, Q. Zhang and T. Jiang, *PLoS One*, 2014, **9**, e91829.
17. H. Zhou, R. Miki, M. Eeva, F. M. Fike, D. Seligson, L. Yang, A. Yoshimura, M. A. Teitell, C. A. Jamieson and N. A. Cacalano, *Clin Cancer Res*, 2007, **13**, 2344-2353.
18. R. Martinez, G. Schackert and M. Esteller, *J Neurooncol*, 2007, **82**, 133-139.
19. H. K. Lee, C. Xiang, S. Cazacu, S. Finniss, G. Kazimirsky, N. Lemke, N. L. Lehman, S. A. Rempel, T. Mikkelsen and C. Brodie, *Neuro Oncol*, 2008, **10**, 236-243.
20. J. J. Virrey, D. Dong, C. Stiles, J. B. Patterson, L. Pen, M. Ni, A. H. Schonthal, T. C. Chen, F. M. Hofman and A. S. Lee, *Mol Cancer Res*, 2008, **6**, 1268-1275.
21. R. Picco, A. Tomasella, F. Fogolari and C. Brancolini, *PLoS One*, 2014, **9**, e110610.
22. R. Jain, L. Poisson, J. Narang, L. Scarpace, M. L. Rosenblum, S. Rempel and T. Mikkelsen, *AJNR Am J Neuroradiol*, 2012, **33**, 1343-1348.
23. F. Ohka, A. Natsume and T. Wakabayashi, *Neurol Res Int*, 2012, **2012**, 878425.
24. A. Guttler, M. Giebler, P. Cuno, H. Wichmann, J. Kessler, C. Ostheimer, A. Soling, C. Strauss, J. Illert, M. Kappler, D. Vordermark and M. Bache, *Radiother Oncol*, 2013, **108**, 535-540.
25. F. Szulzewsky, A. Pelz, X. Feng, M. Synowitz, D. Markovic, T. Langmann, I. R. Holtman, X. Wang, B. J. Eggen, H. W. Boddeke, D. Hambardzumyan, S. A. Wolf and H. Kettenmann, *PLoS One*, 2015, **10**, e0116644.
26. M. Nakada, E. M. Anderson, T. Demuth, S. Nakada, L. B. Reavie, K. L. Drake, D. B. Hoelzinger and M. E. Berens, *Int J Cancer*, 2010, **126**, 1155-1165.
