# Supplementary material for: Integration of pathway structure information into a reweighted partial Cox regression approach for survival analysis on high-dimensional gene expression data
Source: Royal Society of Chemistry journal article supplement (doi:10.1039/c5mb00044k), 2015-04-02
Supplement: c5mb00044k9.xlsx [file c5mb00044k9.xlsx]

## Sheet: Sheet1
Table S8. Comparison of predictive performance of RPCR and PCR with the first N components (N=1,2,…,10).
GBM	GBM-TCGA					GBM-TCGA->GSE4271					GBM-TCGA->GSE4412
	PCR		RPCR			PCR		RPCR			PCR		RPCR
Number of PCR components (k)	C-statistic	C-statistic (sd)	C-statistic	C-statistic (sd)	p-value	C-statistic	C-statistic (sd)	C-statistic	C-statistic (sd)	p-value	C-statistic	C-statistic (sd)	C-statistic	C-statistic (sd)	p-value
1	0.597864	0.0434724	0.5981a	0.0432452	0.05584	0.576974	0.00282823	0.576185	0.00300976	1	0.632757	0.00347504	0.627976	0.0036346	1
2	0.597517	0.0438127	0.600772	0.0438074	< 2.2e-16	0.563194	0.0208461	0.569666	0.0168023	< 2.2e-16	0.637234	0.00802992	0.641277	0.00727282	< 2.2e-16
3	0.606674	0.0415369	0.615217	0.0422281	< 2.2e-16	0.526561	0.0271192	0.541785	0.0221131	< 2.2e-16	0.640734	0.0147572	0.644047	0.0113653	< 2.2e-16
4	0.607282	0.0403885	0.6175b,c	0.03993	< 2.2e-16	0.541272	0.0238632	0.556334	0.017893	< 2.2e-16	0.622627	0.0182566	0.626008	0.0137965	< 2.2e-16
5	0.590174	0.0447385	0.604752	0.0432971	< 2.2e-16	0.528314	0.025408	0.54841	0.0181795	< 2.2e-16	0.597358	0.0210296	0.604034	0.015384	< 2.2e-16
6	0.586861	0.0399669	0.603774	0.0409187	< 2.2e-16	0.52231	0.0233275	0.544806	0.0172722	< 2.2e-16	0.591311	0.0222035	0.598338	0.0165025	< 2.2e-16
7	0.5812	0.0434501	0.596725	0.0447238	< 2.2e-16	0.529801	0.0222532	0.549702	0.0165497	< 2.2e-16	0.596552	0.0218243	0.598962	0.0168683	3.063e-06
8	0.572878	0.0418641	0.591352	0.0428372	< 2.2e-16	0.533672	0.0217911	0.552735	0.0166889	< 2.2e-16	0.596266	0.0246977	0.596654	0.0200473	0.266
9	0.567016	0.0411235	0.583965	0.0417596	< 2.2e-16	0.529816	0.0230606	0.55104	0.0180064	< 2.2e-16	0.589557	0.0274332	0.590052	0.0220067	0.3601
10	0.559517	0.559516	0.578377	0.0425536	< 2.2e-16	0.526665	0.024772	0.549308	0.0190783	< 2.2e-16	0.584612	0.0294076	0.585771	0.0235689	0.0564
BRCA	GSE3494					GSE3494->GSE1456					GSE3494->GSE7390
	PCR		RPCR			PCR		RPCR			PCR		RPCR
Number of PCR components (k)	C-statistic	C-statistic (sd)	C-statistic	C-statistic (sd)	p-value	C-statistic	C-statistic (sd)	C-statistic	C-statistic (sd)	p-value	C-statistic	C-statistic (sd)	C-statistic	C-statistic (sd)	p-value
1	0.707322	0.12221	0.705234	0.120547	4.924e-09	0.751845	0.00250637	0.751963	0.00245235	0.01482	0.876288	0.00929726	0.880624	0.0102443	< 2.2e-16
2	0.708221	0.130179	0.712786	0.134139	0.2103	0.694227	0.021597	0.710078	0.0195772	< 2.2e-16	0.613055	0.0766429	0.672266	0.0785396	< 2.2e-16
3	0.71717	0.125755	0.731459	0.124688	1.531e-05	0.656619	0.0260334	0.683836	0.02291	< 2.2e-16	0.639004	0.0791958	0.708493	0.0733189	< 2.2e-16
4	0.733213	0.123584	0.7395d	0.126808	0.01778	0.630653	0.0261054	0.662852	0.0236624	< 2.2e-16	0.689352	0.0680609	0.755492	0.0537946	< 2.2e-16
5	0.736317	0.123638	0.735906	0.122103	0.02344	0.611268	0.0295519	0.649362	0.0265232	< 2.2e-16	0.663971	0.073722	0.737666	0.0623874	< 2.2e-16
6	0.739211	0.11863	0.747003	0.128372	0.004731	0.596448	0.0305975	0.638382	0.0286926	< 2.2e-16	0.679021	0.0743181	0.754028	0.0591366	< 2.2e-16
7	0.74087	0.119469	0.747717	0.121559	0.00536	0.58043	0.0305442	0.624294	0.0287669	< 2.2e-16	0.68868	0.0787275	0.761745	0.063563	< 2.2e-16
8	0.74262	0.123201	0.746033	0.121481	2.639e-05	0.568094	0.0311113	0.613595	0.0304958	< 2.2e-16	0.69922	0.0772241	0.771807	0.0612033	< 2.2e-16
9	0.729098	0.119148	0.739489	0.12026	1.554e-05	0.561879	0.0316426	0.607667	0.0306831	< 2.2e-16	0.704564	0.0788046	0.774724	0.0639924	< 2.2e-16
10	0.747173	0.124034	0.753024	0.120291	5.371e-05	0.556649	0.0290715	0.602612	0.0295532	< 2.2e-16	0.696254	0.082213	0.769333	0.0652915	< 2.2e-16
aThe better predictive performance with the same number of PCR components is shown in bold.
bThe predictive performance using our components selection method is shown in red.
cFour components are selected on "GBM-TCGA" dataset using the greedy search.
dFour components are selected on "GSE3494" dataset using the greedy search.
