# Supplementary material for: Integration of pathway structure information into a reweighted partial Cox regression approach for survival analysis on high-dimensional gene expression data
Source: Royal Society of Chemistry journal article supplement (doi:10.1039/c5mb00044k), 2015-04-02
Supplement: c5mb00044k10.xlsx [file c5mb00044k10.xlsx]

## Sheet: Sheet1
Table S9. Comparision of significant difference in the risk of death between the high and low risk group stratified by RPCR and PCR with different thresholds (P<0.001 and P<0.05).
		RPCR		PCR
		P<0.001	P<0.05	P<0.001	P<0.05
GBM	The number of PCR components (k)	4	5	4	5
	GBM-TCGA->GSE4271	0.0461a	0.181	0.233	0.465
	GBM-TCGA->GSE4412	0.0173	0.00717	0.0281	0.0106
BRCA	The number of PCR components (k)	3	5	3	5
	GSE3494->GSE1456	0.000651	0.00448	0.0564	0.153
	GSE3494->GSE7390	0.0187	0.0487	0.0804	0.226
aThe p-value from a log-rank test on the risk of death between the high and low risk groups.
